# Supplementary material for: Molecular Pathway and Immune Profile Analysis of IPMN-Derived versus PanIN-Derived Pancreatic Ductal Adenocarcinomas
Source: Preprints.org preprint supplement (doi:10.20944/preprints202409.2045.v1), 2024-09-26
Supplement: Supplementary file 1 [file supplementary]

|  | Survival Long | Survival Short | p-value |
| --- | --- | --- | --- |
| IPMN-derived | 10 | 5 | 0.2968 |
| Non-IPMN-derived | 22 | 25 |  |
